# Supplementary material
Source: PubMed Central journal article supplement (PMC2953589)

## SUPPLEMENTARY MATERIAL

for

### A STRUCTURAL HINGE IN EUKARYOTIC MUTY HOMOLOGUES MEDIATES CATALYTIC ACTIVITY AND RAD9-RAD1-HUS1 CHECKPOINT COMPLEX INTERACTIONS

Paz J. Luncsford<sup>1†</sup>, Dau-Yin Chang<sup>1†</sup>, Guoli Shi<sup>1</sup>, Jade Bernstein<sup>1</sup>, Amrita Madabushi<sup>1</sup>, Dimeka N. Patterson<sup>1</sup>, A-Lien Lu<sup>1,2\*</sup> and Eric A. Toth<sup>1,2\*</sup>

**Table SD1:** Strains used in this study

| Strain                     | Genotype                                                                                        | Source     |
|----------------------------|-------------------------------------------------------------------------------------------------|------------|
| JSP303                     | <i>h<sup>+</sup> leu1-32 his3-D1</i>                                                            | C. Hoffman |
| JSP303-Y4 ( <i>myh1Δ</i> ) | <i>h<sup>+</sup> myh1::his3<sup>+</sup> leu1-32 his3-D1</i>                                     | This lab   |
| Hus1-MYC                   | <i>h<sup>-</sup> leu1-32 ura4-D18 ade6-706 hus1<sup>+</sup>-MYC</i>                             | A. Carr    |
| BM2681                     | <i>h<sup>+</sup> leu1-32 ura4-D18 Cds1<sup>+</sup>-13MYC</i>                                    | P. Russell |
| TMN3309                    | <i>h<sup>-</sup> ade6-M216 leu1-32 ura4-D18 chk1<sup>+</sup>-9MYC-2HA-6His-ura4<sup>+</sup></i> | P. Russell |

**Table SD2: Oligonucleotides used**

| <b>Name</b>         | <b>Sequence</b>                                                                              | <b>Purpose</b>                                 |
|---------------------|----------------------------------------------------------------------------------------------|------------------------------------------------|
| C4F-B               | 5'GGCAGCCATATGGCCTCTGTCTCCFTCATACCA3'                                                        | 5' primer of hMYH(65-350) in pET19b            |
| R-EC5               | 5'GACTCGCTCGAGTCACTTGCGGCTGGCCTTTCTGG3'                                                      | 3' primer of hMYH(65-350) in pET19b            |
| CHANG219            | 5'GGAGATATACATATGTCCGATTCAAATCATTC3'                                                         | 5' primer of SpMYH in pET11a                   |
| CHANG220            | 5'GCAGCCGGATCCTTAGCACTCTGCTTTTCGT3'                                                          | 3' primer of SpMYH in pET11a                   |
| Sp-IA-E262Q-F       | 5'ATTAAATATGATGCACAGGATGTACCC3'                                                              | Sense, I261A and E262Q mutant                  |
| Sp-IA-E262Q-R       | 5'GGGTACATCCTGTGCATCATATTTAAT3'                                                              | Antisense, I261A and E262Q mutant              |
| Sp-5-Bam            | 5'GCATCGGGATCCATGTCCGATTCAAATCAT3'                                                           | 5' primer of SpMYH in pGEX-4T-2                |
| Sp-3-Xho            | 5'TGCGGTCTCGAGTTAGCACTCTGCTTTTCGTTAC3'                                                       | 3' primer of SpMYH in pGEX-4T-2                |
| Xho-5-Sp            | 5'GCATCGCTCGAGATGTCCGATTCAAATCAT3'                                                           | 5' primer of SpMYH in pREP41X                  |
| Xma-3-Sp            | 5'TGCGGTCCC GGTTAGCACTCTGCTTTTCGT3'                                                          | 3' primer of SpMYH in pREP41X                  |
| Hus-5-Bam           | 5'GATCTGGGATCCATGAGATTTAAAACAAGGATT3'                                                        | 5' primer of SpHus1 in pGEX-4T-2               |
| Hus-3-Bam           | 5'GTCTGAGGATCCTTAGTCCACATAGGTACTAATGTA3'                                                     | 3' primer of SpHus1 in pGEX-4T-2               |
| Rad1-5-Bam          | 5'GATATGGGATCCATGTTTCAAGCAGAAACAGTA3'                                                        | 5' primer of SpRad1 in pGEX-4T-2               |
| Rad1-3-Bam          | 5'GTCTGAGGATCCTTAGCTATCCTCATCCTCGGTCTC3'                                                     | 3' primer of SpRad1 in pGEX-4T-2               |
| Rad9-5-Bam          | 5'GATCTGGGATCCATGGAATTCAGTCTTTCAAAT3'                                                        | 5' primer of SpRad9 in pGEX-4T-2               |
| Rad9-3-Bam          | 5'GGAGCTGGATCCCTAGTCTTCTGAGAGAAAATGCC3'                                                      | 3' primer of SpRad9 in pGEX-4T-2               |
| SpMyh245-Xho        | 5'ATCGGGCTCGAGTACCAAGAACAAAACGTAATA3'                                                        | 5' primer of Sp-HIP in p4X-G                   |
| SpMyh245-Bam        | 5'ATCGGGGGATCCTTACTTAGCTGGATGGACTGGATA3'                                                     | 3' primer of Sp-HIP in p4X-G                   |
| SpMyh245-Xho-ATG    | 5'ATCGGGCTCGAGATGTACCAAGAACAAAACGTAATA3'                                                     | 5' primer of Sp-HIP in pREP41X                 |
| SpMyh245-His-Xma    | 5'GGGCTACCCGGGTTAGTGGTGGTGGTGGTGGTCTTAGC<br>TGGATGGACTGGATA3'                                | 3' primer of Sp-HIP in pREP41X                 |
| TOTH382/SpMyh-F     | 5'ATCGTGCAGGTACCGATGTCCGATTCAAATCATTTTT3'                                                    | 5' primer of SpMYH in pLM303                   |
| TOTH371/SpMyh-R     | 5'ATCGTGGGATCCTTAGCACTCTGCTTTTCGTTACAATC3'                                                   | 3' primer of SpMYH in pLM303                   |
| SpMyh-Sal-F         | 5'GGTGTGTTGCGAGATATCCAGTCGACCCAGCTAAGACAA<br>ACAACG3'                                        | Sense, SalI-mutant of SpMyh1                   |
| SpMyh-Sal-R         | 5'CGTTGTTTTGTCTTAGCTGGGTCGACTGGATATCTCGCA<br>ACAACCC3'                                       | Antisense, SalI-mutant of SpMyh1               |
| SpMyh_NdeI          | 5'TGCAATCGCATATGTCCGATTCAAATCATTTTT3'                                                        | 5' primer of SpMYH in pET11a                   |
| SpMyh_SalI          | 5'ATCGTGCCTCGACCGTCTGTTTCGGTTTTTTGCCGGAT<br>AAAGCGCCAGCTATTTGCTTTACAAATTTTCAGAGATTG<br>GGC3' | 3' primer, Ec-linker + NTD-SpMyh1 <sup>a</sup> |
| SpCHIM-Sal-to-Nat-F | 5'CCGAAACAGACGGTCCATCCAGCTAAGACAAAACAACG3'                                                   | Sense, revert SalI-mutant to WT                |
| SpCHIM-Sal-to-Nat-R | 5'CGTTGTTTTGTCTTAGCTGGATGGACCGTCTGTTTCGG3'                                                   | Antisense, revert SalI-mutant to WT            |

<sup>a</sup>NTD is abbreviated for "N-terminal domain"

**Figure SD1.** hMYH(65-350) is catalytically active as an adenine glycosylase. Lane 1 of the gel is the DNA substrate containing a centrally located A/8-oxoG mispair. In lanes 2-8, the DNA substrate (0.18 nM) was incubated with increasing concentrations of recombinant hMYH(65-350) (1, 2, 4, 8, 16, 32, and 64 nM, respectively). Reactions were carried out at 37 °C for 30 minutes and the products were separated on a 14% DNA sequencing gel. Arrows mark the intact DNA substrate (I) and the nicked product (N). The gel image was viewed on a PhosphorImager.

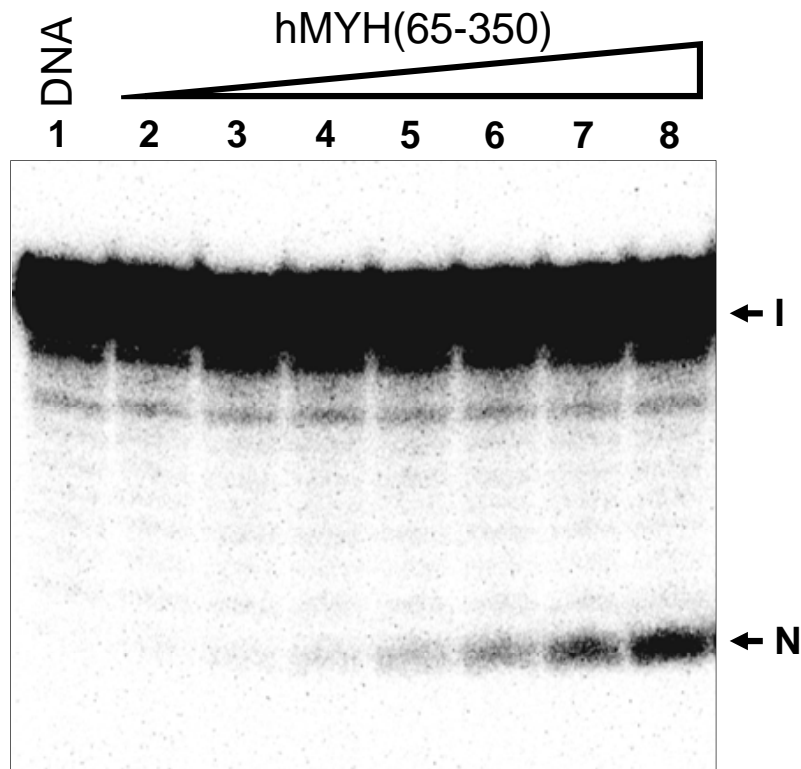

**Figure SD2.** Stereo diagram of a (2Fo-Fc) electron density map of the hMYH(65-350) IDC. The map includes residues 292-301 of hMYH(65-350) and is contoured at  $1\sigma$ .

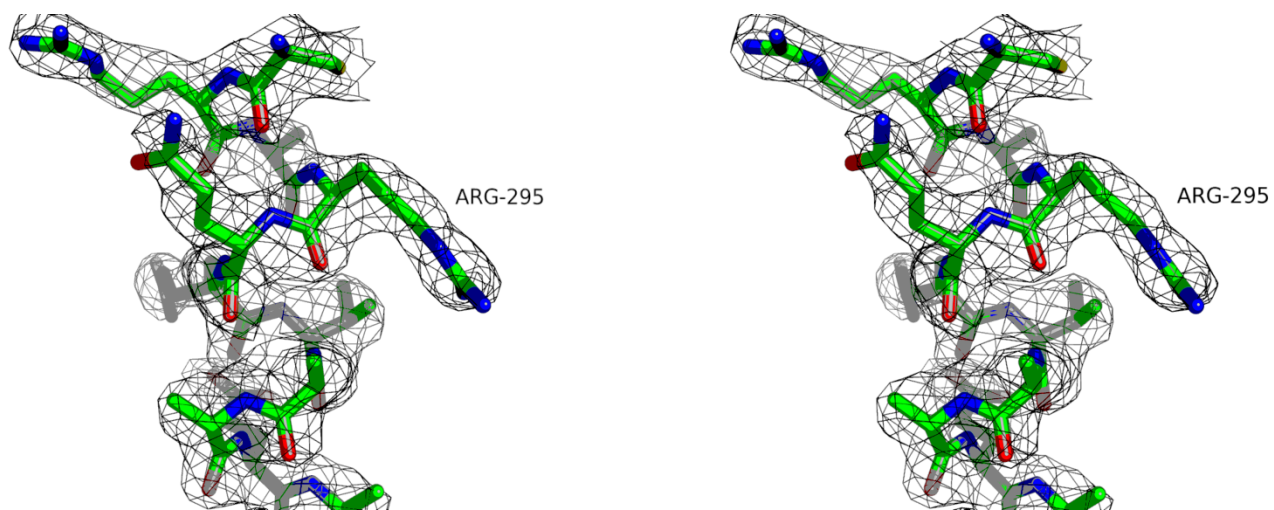

**Figure SD3.** Homology model of the SpMyh1-Chimera. Prior to constructing the SpMyh1-Chimera, we used SWISS-MODEL (<http://swissmodel.expasy.org/>) to determine whether the EcMutY linker would be long enough to accommodate the bulkier N- and C-terminal domains of SpMyh1-WT without creation of unfavorable steric interactions. The N- and C-terminal domains of SpMyh1-WT (residues 1-244 and 289-461 of SpMyh1) are depicted in blue on the right and left, respectively. The EcMutY linker (residues 214-227 of EcMutY) is shown in red.

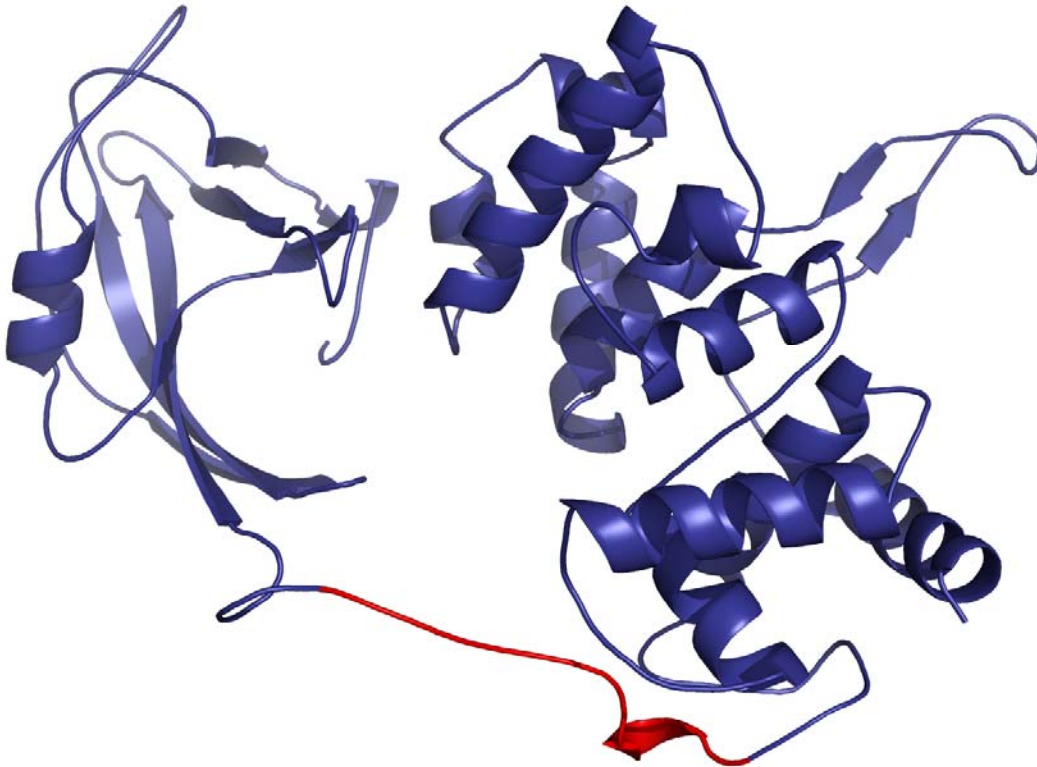

**Figure SD4.** DNA-binding affinities of SpMyh1-WT and SpMyh1-Chimera for a C:G substrate. A 19 base-pair duplex DNA substrate, with a centrally located C:G pair, was used with one base overhanging at the 5' end of the DNA strand containing guanine. The strand containing the cytosine base was 5'-labeled with fluorescein. The C:G substrate was incubated with either SpMyh1-WT or SpMyh1-Chimera over a range of protein concentrations. Each of the experiments was completed in triplicate. For SpMyh1-WT, the anisotropy values did not increase with increasing protein concentrations indicating that SpMyh1-WT does not recognize DNA containing C:G base pairs as a specific substrate. Alternatively, SpMyh1-Chimera appeared to bind the C:G substrate with modest affinity. Using a binary binding model in GraphPad Prism 3.03, a binding isotherm was fit for the SpMyh1-Chimera data. For three experiments, the average  $K_d$  was  $98 \pm 11$  nM.

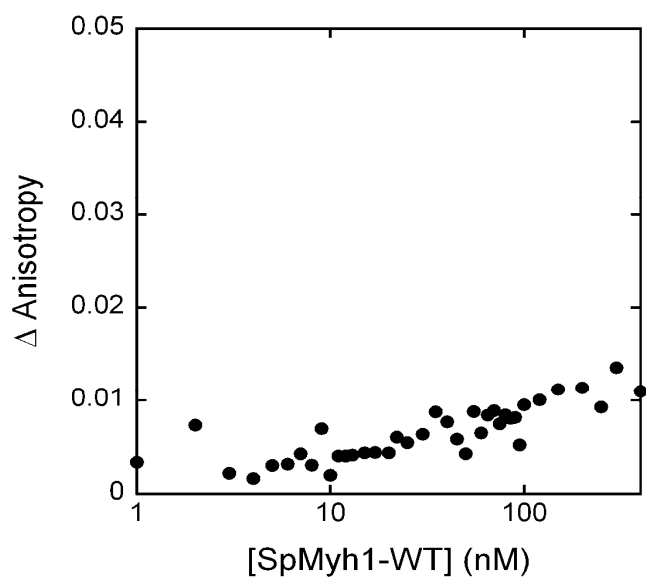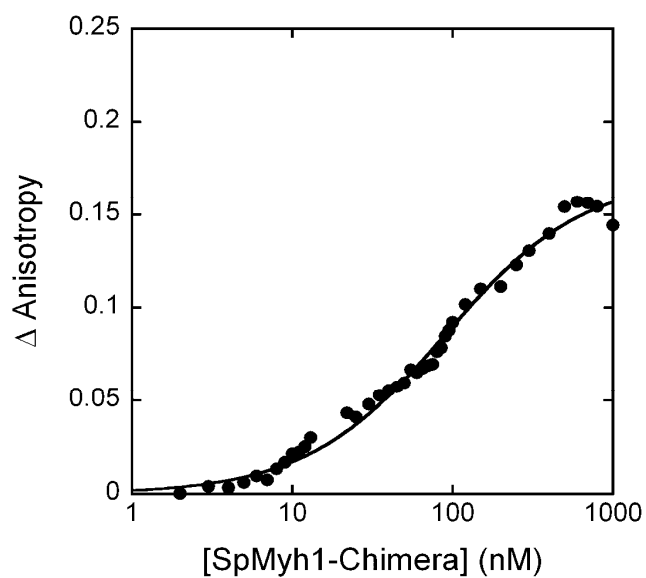

**Figure SD5.** Superposition of the hMYH(65-350) and BsMutY-DNA Complex structures. The model of the hMYH(65-350) structure (blue) was superposed with the model of BsMutY (red and cyan) bound to DNA (light gray) containing a substrate adenine (PDB ID 1RRQ). The BsMutY linker (cyan) traverses directly away from its N-terminal catalytic domain (red, right side of panel) to its C-terminal 8-oxoG recognition domain (red, left side of panel). Conversely, a helical extension projects the hMYH IDC away from its catalytic domain.

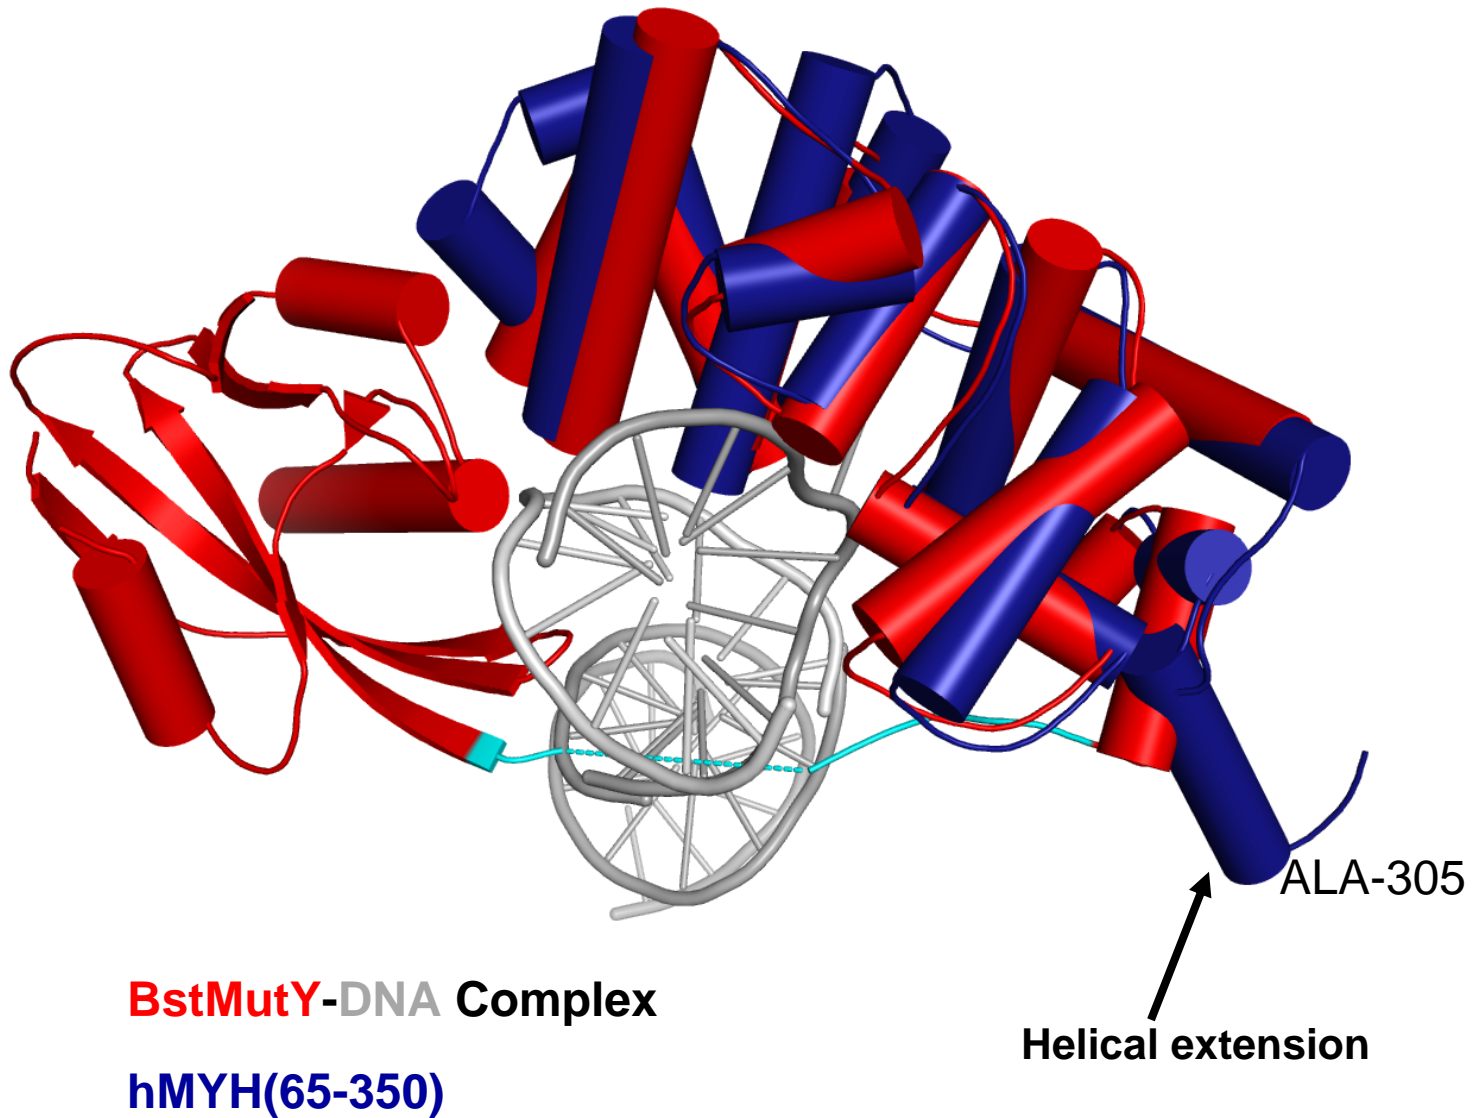

Supplement: NIHMS234360-supplement-01.pdf [file NIHMS234360-supplement-01.pdf]
